# Supplementary material for: Evaluation of mesoporous polyaniline for glucose sensor under different pH electrolyte conditions
Source: publisher site journal article supplement (doi:10.1515/bmt-2024-0141), 2024-12-29
Supplement: Supplementary file 1 [file j_bmt-2024-0141_suppl_001.docx]

**Evaluation of mesoporous polyaniline for glucose sensor under different pH electrolyte conditions**

Zinah N. Alabdali 1, Amar Al-Keisy2,*, Sinan S. Hamdi2

1 Materials Engineering Department, University of Technology-Iraq

2 Nanotechnology and Advanced Materials Research Center, University of Technology-Iraq

[*Amar.h.alkeisy@uotechnology.edu.iq](mailto:*Amar.h.alkeisy@uotechnology.edu.iq)

S1: CV for GC bar and GC/Polyaniline under pH=5.5 , the electrolyte solution is phosphate buffered saline (0.1 M). scan rate was 50 mV/s, glucose concentration was 5 mM.
